# Supplementary material for: Marcasite iron sulfide as a high-capacity electrode material for sodium storage
Source: Royal Society of Chemistry journal article supplement (doi:10.1039/c8ta06312e), 2018-01-01
Supplement: c8ta06312e1.pdf [file c8ta06312e1.pdf]

Electronic Supplementary Material (ESI) for Journal of Materials Chemistry A.  
This journal is © The Royal Society of Chemistry 2018

## Supplementary Information

# **Marcasite Iron Sulfide as a High-Capacity Electrode Material for Sodium Storage**

Natalia Voronina<sup>a</sup>, Hitoshi Yashiro<sup>b</sup>, Seung Taek Myung<sup>a,\*</sup>

<sup>a</sup> Department of Nano Technology and Advanced Materials Engineering, Sejong Battery Institute, Sejong University, Seoul, 05006, South Korea.

<sup>b</sup> Department of Chemistry and Bioengineering, Iwate University, 4-3-5 Ueda, Morioka, Iwate 020-8551, Japan

---

\*Corresponding author

Tel: 82 23408-3454, fax: 82 23408-4342, e-mail: [smyung@sejong.ac.kr](mailto:smyung@sejong.ac.kr) (S.T. Myung)

**SI Table 1.** Structural parameters obtained from Rietveld refinements for FeS<sub>2</sub>(M) and FeS<sub>2</sub>(M)/C

**FeS<sub>2</sub>(M)**

| Composition               |                  |          | FeS <sub>2</sub> |   |                    |   |
|---------------------------|------------------|----------|------------------|---|--------------------|---|
| Space group               |                  |          | <i>Pnnm</i>      |   |                    |   |
| Atom                      | Wyckoff Position | x        | y                | z | B / Å <sup>2</sup> | g |
| Fe                        | 2 <i>a</i>       | 0        | 0                | 0 | 0.04               | 1 |
| S                         | 4 <i>g</i>       | 0.202(5) | 0.382(5)         | 0 | 0.05               | 1 |
| Lattice parameters        |                  |          | a=4.447(5)Å      |   |                    |   |
|                           |                  |          | b=5.427(5)Å      |   |                    |   |
|                           |                  |          | c=3.387(5)Å      |   |                    |   |
| <i>R<sub>p</sub></i> / %  |                  |          | 6.82             |   |                    |   |
| <i>R<sub>wp</sub></i> / % |                  |          | 9.08             |   |                    |   |

**FeS<sub>2</sub>(M)/C**

| Composition               |                  |          | FeS <sub>2</sub> |   |                    |   |
|---------------------------|------------------|----------|------------------|---|--------------------|---|
| Space group               |                  |          | <i>Pnnm</i>      |   |                    |   |
| Atom                      | Wyckoff Position | x        | y                | z | B / Å <sup>2</sup> | g |
| Fe                        | 2 <i>a</i>       | 0        | 0                | 0 | 0.05               | 1 |
| S                         | 4 <i>g</i>       | 0.202(5) | 0.382(5)         | 0 | 0.06               | 1 |
| Lattice parameters        |                  |          | a=4.447(5)Å      |   |                    |   |
|                           |                  |          | b=5.427(5)Å      |   |                    |   |
|                           |                  |          | c=3.387(5)Å      |   |                    |   |
| <i>R<sub>p</sub></i> / %  |                  |          | 5.14             |   |                    |   |
| <i>R<sub>wp</sub></i> / % |                  |          | 6.37             |   |                    |   |

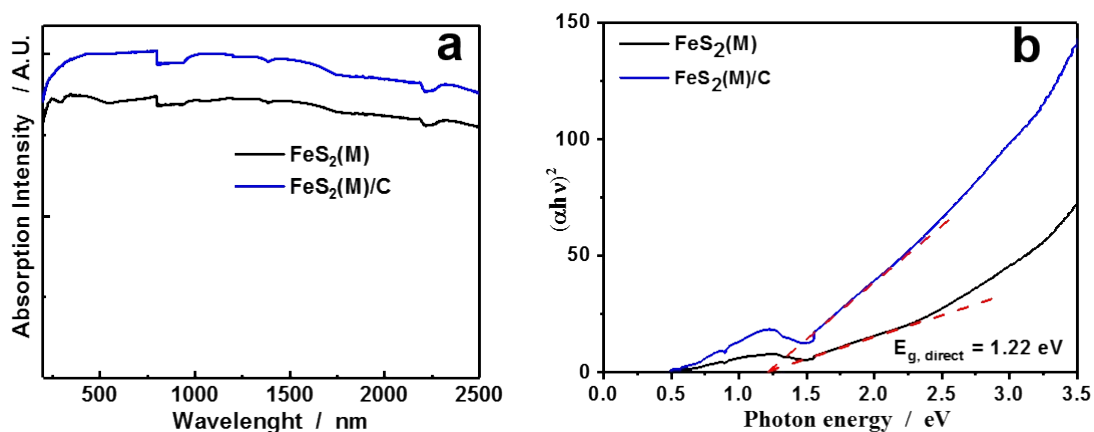

**SI Figure 1.** (a) UV-vis-NIR absorbance spectra of  $\text{FeS}_2(\text{M})$  and  $\text{FeS}_2(\text{M})/\text{C}$  (b) Tauc plots of  $\text{FeS}_2(\text{M})$  and  $\text{FeS}_2(\text{M})/\text{C}$

The optical behavior of  $\text{FeS}_2(\text{M})$  and  $\text{FeS}_2(\text{M})/\text{C}$  was studied by UV-vis-NIR absorbance spectroscopy. From the absorbance spectra, the optical band gaps of  $\text{FeS}_2(\text{M})$  and  $\text{FeS}_2(\text{M})/\text{C}$  were calculated by using Tauc equation.<sup>1</sup> The measurement showed a direct band gap of 1.22 eV with a subgap optical absorption at 0.5 eV for both  $\text{FeS}_2(\text{M})$  and  $\text{FeS}_2(\text{M})/\text{C}$  materials.

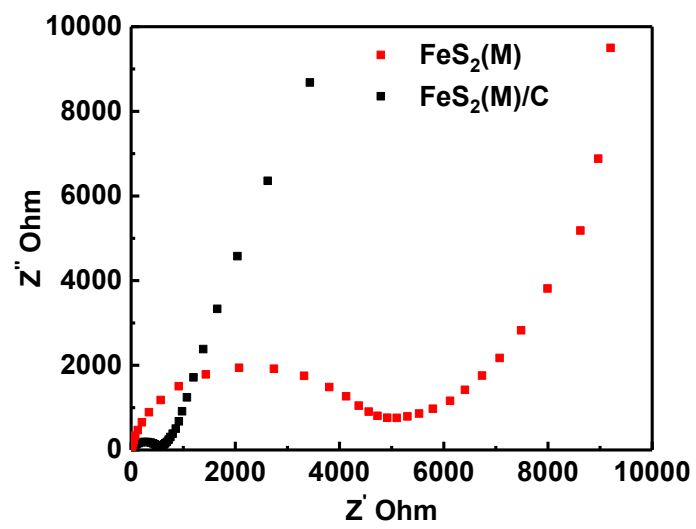

**SI Figure 2.** AC impedance spectra of FeS<sub>2</sub>(M) and FeS<sub>2</sub>(M)/C composite before cycling.

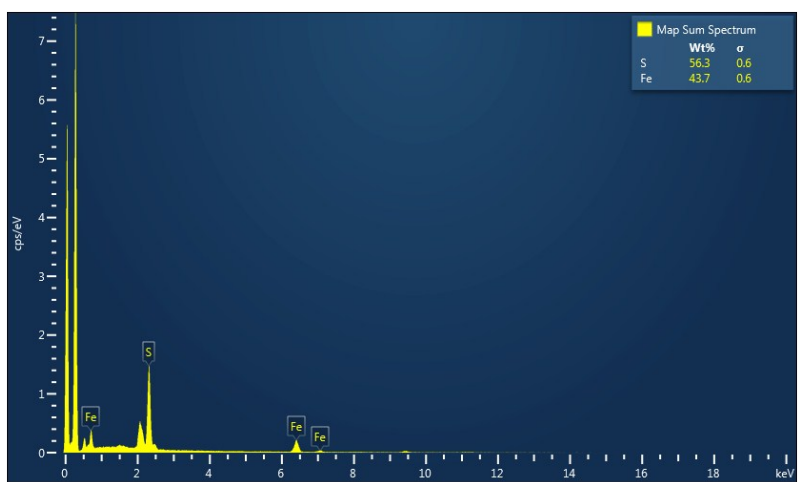

**SI Figure 3.** EDX spectrum of FeS<sub>2</sub>(M).

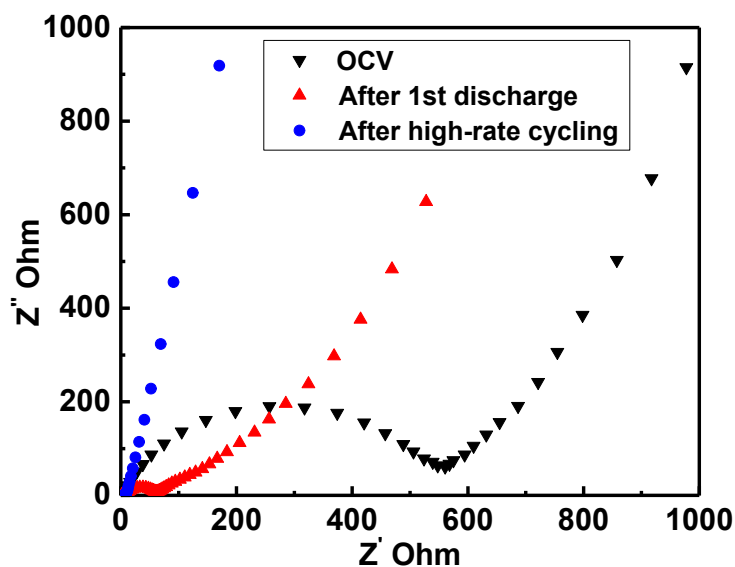

**SI Figure 4.** AC impedance spectra of FeS<sub>2</sub>(M)/C before cycling OCV, after 1<sup>st</sup> discharge to 0.8V and after high-rate cycling.

Impedance Nyquist plots were collected before cycling at OCV, after first discharge and after high-rate cycling. The Nyquist plot shows that the charge transfer resistance decreases significantly after first discharge proceeds and even underwent significant reduction after charge-discharge cycles, especially after high-rate cycling, which prove that the superior rate capability is attributed to the improved charge transfer.

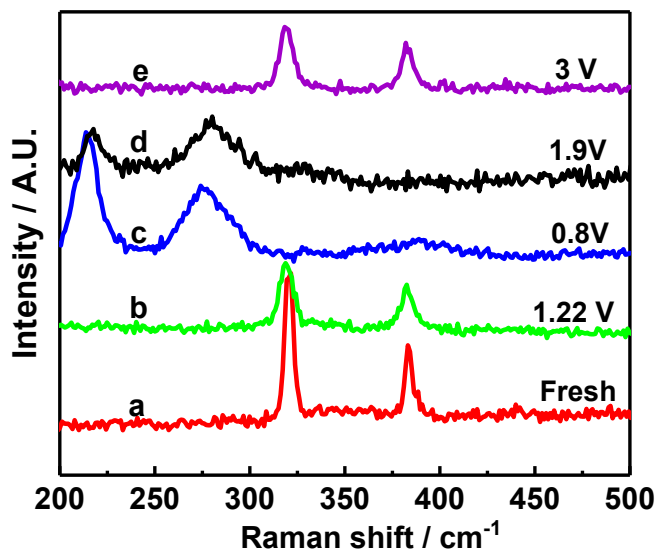

**SI Figure 5.** Raman spectra of FeS<sub>2</sub>(M)/C electrode (a) fresh (b) discharged to 1.22 V (c) discharged to 0.8 V (d) charged to 1.9 V (e) charged to 3 V

Ex situ Raman was used to identify the structural transformations of FeS<sub>2</sub>(M)/C composite during first discharge and charge. The Raman spectra of fresh electrode exhibit two peaks of A<sub>g</sub> mode of FeS<sub>2</sub>(M) structure. These peaks started to weaken as the sodiation goes and disappear at 0.8 V. At the same time three significant modes at 217, 274, 384 cm<sup>-1</sup> ascribed to FeS structure<sup>2</sup> appeared and observed at discharge to 0.8V. During further desodiation, the peaks of FeS structure start to decrease and at the end of charge A<sub>g</sub> vibration of FeS<sub>2</sub>(M) reforms back, indicating that the reaction of FeS<sub>2</sub>(M)/C composite is highly reversible.

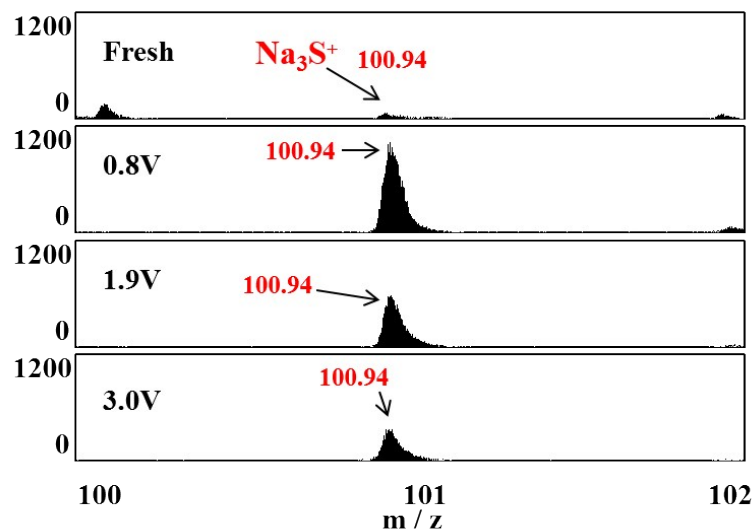

**SI Figure 6.** TOF-SIMS spectra of  $\text{FeS}_2(\text{M})/\text{C}$  upon sodiation (discharge) to 0.8 V and desodiation (charge) to 3 V,  $\text{Na}_3\text{S}^+$  positive fragment ( $m=100.94$ )

## References

- 1 J. Tauc, A. Menth, *J Non-Cryst Solids*, 1972, **8–10**, 569–585
- 2 P. Ramakrishnan, S. Shanmugam, J. H. Kim, *ChemSusChem.*, 2017, **10**, 1 – 10
